# Supplementary material for: Development and implementation of the SUM breast cancer cell line functional genomics knowledge base
Source: PubMed Central journal article supplement (PMC7374090; doi:10.1038/s41523-020-0173-z), 2020-07-21
Supplement: 41523_2020_173_MOESM1_ESM.pdf [file 41523_2020_173_MOESM1_ESM.pdf]

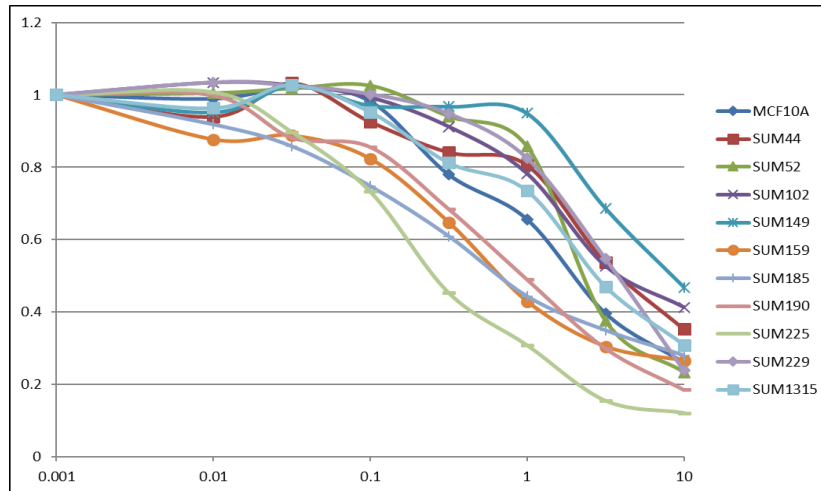

Supplementary figure 1. Response of the SUM cell line panel and MCF-10A cells to the Class-I alpha specific PI3K inhibitor Alpelisib. Cells were seeded in 6 well plates and treated with half-log increasing concentrations of drug for 72 hours. The number of viable cells per well was determined in triplicate wells and plotted. These data were used to determine the IC50 for this drug for each cell line



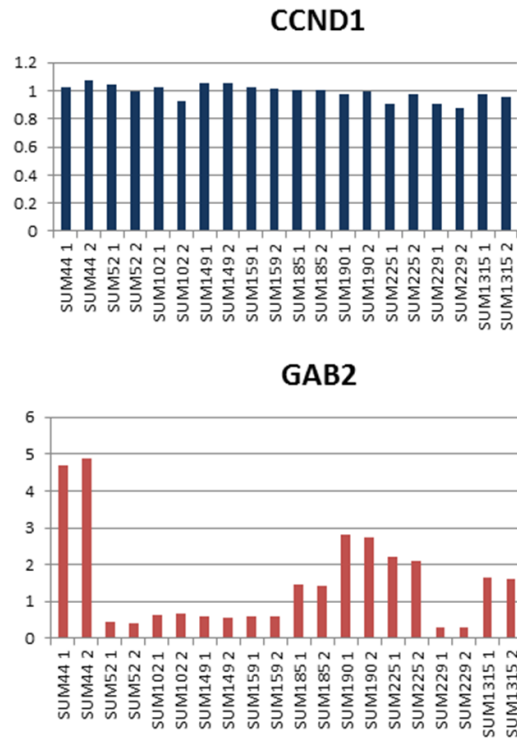

Supplementary Figure 3. Proteomic analysis of CCND1 and GAB2 across the cell line panel showing that for SUM-44 and SUM-190 cells, both of which exhibit the 11q14 amplicon, only GAB 2 is overexpressed at the protein level, suggesting that it is the driver from this

Supplementary Table 1. Overall Oncogene Signature for SUM-185 cells

| <u>GeneSymbol</u> | <u>QuantLog</u> | <u>QuantLogRank</u> | <u>ScreenHit</u> | <u>LogFoldChange</u> | <u>DnaAmp</u> | <u>Mutation</u> | <u>OccurencesInCosmic</u> | <u>ExistingDrugs</u>                  |
|-------------------|-----------------|---------------------|------------------|----------------------|---------------|-----------------|---------------------------|---------------------------------------|
| BCL2L1            | 5.8             | 5                   | 1                | 1.16583842           | 1.1286        |                 | 0                         | Obatoclox Mesylate, Navitoclox, TW 37 |
| ID1               | 2.88            | 194                 | 1                | -0.69357046          | 1.1286        |                 | 0                         |                                       |
| ACSS1             | 2.88            | 195                 | 1                | 1.24251594           | 1.0234        |                 | 0                         |                                       |
| ANKRD17           | 2.84            | 213                 | 1                | 0.94384974           | 0.864         |                 | 0                         |                                       |
| NDUFA13           | 2.84            | 216                 | 1                | 0.48131581           | 0.9679        |                 | 0                         |                                       |
| POFUT1            | 2.76            | 252                 | 1                | 0.6381823            | 1.1286        |                 | 0                         |                                       |
| FGFR3             | 2.75            | 261                 | 1                | 2.87313456           | 1.1797        |                 | 0                         | PD173074                              |
| ISYNA1            | 2.47            | 542                 | 1                |                      | 0.9679        |                 | 0                         |                                       |
| PIK3CA            | 2.45            | 579                 | 1                |                      |               | PIK3CAp.H1047R  | 1889                      | ZSTK474, PI-103, A66, BKM120          |
| NKX2-2            | 2.3             | 876                 | 1                | 1.55802764           | 1.0234        |                 | 0                         |                                       |
| GPT2              | 2.29            | 911.5               | 1                |                      | 0.9666        |                 | 0                         |                                       |
| CTBP1             | 2.28            | 938                 | 1                |                      | 1.1797        |                 | 0                         |                                       |
| SSTR4             | 2.26            | 980                 | 1                | 0.12581405           | 1.0234        |                 | 0                         |                                       |
| HSPBP1            | 2.26            | 997                 | 1                |                      | 0.9871        |                 | 0                         |                                       |
| COX4I2            | 2.21            | 1159                | 1                | -0.07737755          | 1.1286        |                 | 0                         |                                       |
| IDUA              | 2.19            | 1245                | 1                |                      | 1.1797        |                 | 0                         |                                       |

Supplementary Table 2. Functional Oncogene Signature for SUM-185 cells

| <u>GeneSymbol</u> | <u>QuantLog</u> | <u>QuantLogRank</u> | <u>ScreenHit</u> | <u>LogFoldChange</u> | <u>DnaAmp*</u> | <u>Mutation</u> | <u>OccurencesInCosmic</u> | <u>ExistingDrugs</u>                  |
|-------------------|-----------------|---------------------|------------------|----------------------|----------------|-----------------|---------------------------|---------------------------------------|
| BCL2L1            | 5.8             | 5                   | 1                | 1.165838             | 1.1286         |                 | 0                         | Obatoclox Mesylate, Navitoclox, TW 37 |
| FGFR3             | 2.75            | 261                 | 1                | 2.873135             | 1.1797         |                 | 0                         | PD173074                              |
| PIK3CA            | 2.45            | 579                 | 1                |                      |                | PIK3CAp.H1047R  | 1889                      | ZSTK474, PI-103, A66, BKM120          |

Supplementary Table 3. Overall Oncogene Signature for SUM-190 cells

| <u>GeneSymbol</u> | <u>QuantLog</u> | <u>QuantLogRank</u> | <u>ScreenHit</u> | <u>LogFoldChange</u> | <u>DnaAmp</u> | <u>Mutation</u> | <u>OccurencesInCosmic</u> | <u>ExistingDrugs</u>         |
|-------------------|-----------------|---------------------|------------------|----------------------|---------------|-----------------|---------------------------|------------------------------|
| PIK3CA            | 23.63           | 88                  | 1                |                      |               | PIK3CAp.H1047R  | 1889                      | ZSTK474, PI-103, A66, BKM120 |
| C8ORF59           | 19.25           | 125                 | 1                | 0.05970123           | 0.8672        |                 |                           | 0                            |
| RPL30             | 18.93           | 131                 | 1                | 0.59585438           | 0.8672        |                 |                           | 0                            |
| STK3              | 17.5            | 150                 | 1                | 0.83040697           | 0.8672        |                 |                           | 0                            |
| RPL27             | 13.14           | 291                 | 1                | -0.37313864          | 3.0084        |                 |                           | 0                            |
| PLEKHF2           | 12.91           | 306                 | 1                | 2.1968959            | 0.8672        |                 |                           | 0                            |
| NR1D1             | 11.56           | 370                 | 1                | 1.6186231            | 3.4173        |                 |                           | 0                            |
| FNDC8             | 11.34           | 384                 | 1                |                      | 1.1823        |                 |                           | 0                            |
| TTC35             | 10.22           | 485                 | 1                | 1.29444378           | 0.8672        |                 |                           | 0                            |
| SPAG1             | 9.72            | 534                 | 1                | 1.35994785           | 0.8672        |                 |                           | 0                            |
| UCHL5IP           | 9.69            | 540                 | 1                |                      | 0.9519        |                 |                           | 0                            |
| UBN1              | 9.59            | 547                 | 1                | 1.1575795            | 0.8509        |                 |                           | 0                            |
| LRP12             | 8.2             | 761                 | 1                | -0.79953172          | 0.8672        |                 |                           | 0                            |
| EPHA5             | 8.05            | 787                 | 1                | 0                    | 1.3009        |                 |                           | 0                            |
| RTN4RL2           | 7.47            | 931                 | 1                |                      | 1.3972        |                 |                           | 0                            |
| CXCL5             | 7.42            | 948                 | 1                | 0.88665718           | 0.8759        |                 |                           | 0                            |
| MTCP1             | 7.41            | 951                 | 1                | 0.28502328           | 1.2645        |                 |                           | 0                            |
| TMEM106A          | 7.36            | 965                 | 1                |                      | 3.0084        |                 |                           | 0                            |

Supplementary Table 4. Functional Oncogene Signature for SUM-190 cells

| <u>GeneSymbol</u> | <u>QuantLog</u> | <u>QuantLogRank</u> | <u>ScreenHit</u> | <u>LogFoldChange</u> | <u>DnaAmp</u> | <u>Mutation</u> | <u>OccurencesInCosmic</u> | <u>ExistingDrugs</u>         |
|-------------------|-----------------|---------------------|------------------|----------------------|---------------|-----------------|---------------------------|------------------------------|
| PIK3CA            | 23.63           | 88                  | 1                |                      |               | PIK3CAp.H1047R  | 1889                      | ZSTK474, PI-103, A66, BKM120 |
| EPHA5             | 8.05            | 787                 | 1                | 0                    | 1.3009        |                 | 0                         |                              |

Supplementary Table 5. Functional Oncogene Signature for SUM-225

..

| <u>GeneSymbol</u> | <u>QuantLog</u> | <u>QuantLogRank</u> | <u>ScreenHit</u> | <u>LogFoldChange</u> | <u>DnaAmp</u> | <u>Mutation</u> | <u>OccurencesInCosmic</u> | <u>ExistingDrugs</u>                    |
|-------------------|-----------------|---------------------|------------------|----------------------|---------------|-----------------|---------------------------|-----------------------------------------|
| RAD21             | 11.57           | 441                 | 1                | 0.8419769            | 0.9908        |                 | 0                         |                                         |
| ERBB2             | 6.68            | 1105                | 1                | 3.4614734            | 5.1635        |                 | 0                         | Lapatinib, CP724714, CUDC-101, Afatinib |
